# Supplementary material
Source: HighWire-hosted journal article supplement (https://www.annfammed.org/highwire/filestream/8688/field_highwire_adjunct_files/0/Ford_Supp_Apps_1-2.pdf)
Supplement: Ford_Supp_Apps_1-2.pdf [file Ford_Supp_Apps_1-2.pdf]

## Supplemental Appendixes 1-2 for:

---

Ford E, Paudyal P, Smith H, Stephens S. Effectiveness of psychological interventions for postnatal depression in primary care: a meta-analysis. *Ann Fam Med*. 2016;14(5):463-472.

---

## Appendices

### Appendix 1: Search Strategy

|                                                                                         | Search A                   | Search B                                                                                                    |
|-----------------------------------------------------------------------------------------|----------------------------|-------------------------------------------------------------------------------------------------------------|
| 1                                                                                       | "postnatal"                | "Intervention"                                                                                              |
| 2                                                                                       | "postpartum"               | "Treat*"                                                                                                    |
| 3                                                                                       | "perinatal"                | "Psychosocial"                                                                                              |
| 4                                                                                       | "post natal"               | "Psycholog*"                                                                                                |
| 5                                                                                       | "post partum"              | "psychoeduc*"                                                                                               |
| 6                                                                                       | "peri natal"               | "therapy"                                                                                                   |
| 7                                                                                       | 1 or 2 or 3 or 4 or 5 or 6 | "cognitive behavioural therapy"                                                                             |
| 8                                                                                       | "depression"               | "cognitive behavioral therapy"                                                                              |
| 9                                                                                       | "mood disorder"            | "CBT"                                                                                                       |
| 10                                                                                      | "anxiety"                  | "interpersonal therapy"                                                                                     |
| 11                                                                                      | 8 or 9 or 10               | "interpersonal psychotherapy"                                                                               |
| 12                                                                                      | 7 AND 11                   | "IPT"                                                                                                       |
| 13                                                                                      | "PND"                      | "psychodynamic therapy"                                                                                     |
| 14                                                                                      | 12 or 13                   | "insight-oriented therapy"                                                                                  |
| 15                                                                                      |                            | "counseling"                                                                                                |
| 16                                                                                      |                            | "counselling"                                                                                               |
| 17                                                                                      |                            | "peer support"                                                                                              |
| 18                                                                                      |                            | "partner support"                                                                                           |
| 19                                                                                      |                            | "home visits"                                                                                               |
| 20                                                                                      |                            | "debriefing"                                                                                                |
| 21                                                                                      |                            | 1 or 2 or 3 or 4 or 5 or 6 or 7 or 8 or 9 or 10 or 11 or 12 or 13 or 14 or 15 or 16 or 17 or 18 or 19 or 20 |
| Results of search A and search B combined and limited to English and human studies only |                            |                                                                                                             |

## **Appendix 2: The adapted CCDAN QRS for assessment of study quality**

### **1. Objectives**

0= objectives unclear

1= objectives clear but main outcome not a priori

2= objectives clear and main outcome a priori

### **2. Sample size**

0= <50 per group

1= 51-100 per group

2= >100 per group

### **3. Duration of trial and follow-up**

0= <3 months

1= >3 months and <6 months

2= >6 months

### **4. Power**

0= not reported

1= mentioned without details

2= details of calculation provided

### **5. Method of allocation**

0= unrandomized and likely to be biased

1= partial or quasi-randomized with bias possible

2= randomized allocation

### **6. Concealment**

0= not done or not reported

1= partial concealment reported

2= done adequately

### **7. Description of treatment**

0= main treatments not clearly described

1= inadequate details of main or adjunctive treatments

2= full details of main or adjunctive treatments

### **8. Source of subjects, representativeness of sample**

0= source of subjects not described

1= source of subjects but unrepresentative

2= source of subjects plus representative sample

### **9. Diagnostic/inclusion criteria**

0= none

1= diagnostic criteria or clear inclusion criteria

2= diagnostic criteria and specification of severity

### **10. Record of exclusion criteria, exclusions, refusals**

0= criteria and number not reported  
1= criteria or number not reported  
2= criteria and number reported

11. Description of sample demographics  
0= little/no info (only age/sex)  
1= basic details (marital status/ethnicity)  
2= full description (socio-economic status/clinical history)

12. Adherence /attendance for therapy  
0= not assessed  
1= assessed for some experimental treatments  
2= assessed for all experimental treatments

13. Record of number/reasons for withdrawal by group  
0= no info on withdrawals by group  
1= withdrawals by group without reason  
2= withdrawals and reason by group

14. Outcome measures/use of validated instruments  
0= outcomes not described clearly  
1= some outcomes not clearly described  
2= outcomes described and valid/reliable

15. Group comparability and adjustment in analysis  
0= no information on comparability  
1= some information with adjustment  
2= sufficient information with adjustment

16. Inclusion of withdrawals in analysis (ITT)  
0= not included or reported  
1= withdrawals included by estimation of outcome  
2= withdrawals followed up and included in analysis

17. Results presented with data for re-analysis  
0= inadequate presentation  
1= adequate  
2= comprehensive

18. Appropriate statistical analysis  
0= inappropriate  
1= mainly appropriate  
2= appropriate and comprehensive

19. Conclusions justified  
0= no  
1= partially

2= yes

20. Declaration of interests

0= No

2= Yes
